# Supplementary material for: Does Self-Care Make You a Better Leader? A Multisource Study Linking Leader Self-Care to Health-Oriented Leadership, Employee Self-Care, and Health
Source: MDPI journal article supplement (doi:10.3390/ijerph19116733), 2022-05-31
Supplement: s1 [file s1]

*Table S1.* Overview of item loadings in the CFA on employee self care and staff care

| <b>Item no.</b>   | <b>Content</b>                                                                                                                                                                    | <b>Factor loading</b> |
|-------------------|-----------------------------------------------------------------------------------------------------------------------------------------------------------------------------------|-----------------------|
| <i>Self care</i>  |                                                                                                                                                                                   |                       |
| Hol_sb1           | I pay attention to a healthy lifestyle (e.g., healthy food, no smoking, doing sports)                                                                                             | .34                   |
| Hol_sb2           | I do a lot for my health in my spare time                                                                                                                                         | .39                   |
| Hol_sb3           | I see to it that I get enough relaxation and recovery                                                                                                                             | .66                   |
| Hol_sb4           | In my job it happens again and again that I pay too little attention to my health                                                                                                 | .39                   |
| Hol_sb5*          | When things have been stressful for a longer amount of time, I make sure to slow down afterwards                                                                                  | .72                   |
| Hol_sb6*          | Oftentimes I expect too much of myself at work                                                                                                                                    | .36                   |
| Hol_sb7           | I regularly keep myself informed about workplace safety rules and offers for worksite health promotion                                                                            | .32                   |
| Hol_sb8           | Even in face of high time pressure, I consistently follow the safety rules                                                                                                        | .40                   |
| Hol_sb9*          | If there is a lot of work to do I sometimes skip my breaks                                                                                                                        | .32                   |
| Hol_sb10          | I take advantage of workplace health promotion offers (e.g., back exercises, relaxation, stress management)                                                                       | .14                   |
| Hol_sb11          | I try to reduce my demands by optimizing my personal work routine (e.g., set priorities, care for undisturbed working, daily planning)                                            | .59                   |
| Hol_sb12          | I try to reduce my demands by optimizing my working conditions (e.g., avoid unbalanced body-posture, care for enough, space, avoid draft)                                         | .54                   |
| Hol_sb13          | I try to reduce my demands by optimizing my personal work-life balance (e.g., take regular breaks, avoid overtime, no work on the weekend, avoid the expiration of vacation days) | .61                   |
| Hol_sb14          | I see to it that I have enough support when I need it                                                                                                                             | .62                   |
| <i>Staff care</i> |                                                                                                                                                                                   |                       |
| Hol_mb1           | My supervisor encourages me to care for a healthy lifestyle (e.g., healthy food, no smoking, doing sports)                                                                        | .65                   |
| Hol_mb2           | My supervisor regularly motivates me to do a lot for health in my spare time                                                                                                      | .64                   |
| Hol_mb3           | My supervisor tries to be a good role model for me with regard to health                                                                                                          | .67                   |
| Hol_mb4           | My supervisor sees to it that I have enough relaxation and recovery                                                                                                               | .77                   |
| Hol_mb5*          | In my job it often happens that my supervisor pays too little attention to my health                                                                                              | .46                   |
| Hol_mb6           | When work has been stressful for a longer period of time, my supervisor ensures that things slow again afterwards                                                                 | .66                   |
| Hol_mb7*          | Oftentimes my supervisor expects too much of me                                                                                                                                   | .48                   |
| Hol_mb8           | My supervisor invites me to inform him/her about my work-related health risks                                                                                                     | .66                   |

|           |                                                                                                                                                                |     |
|-----------|----------------------------------------------------------------------------------------------------------------------------------------------------------------|-----|
| Hol_mb9   | My supervisor regularly keeps us informed about safety rules and worksite health promotion activities                                                          | .53 |
| Hol_mb10  | Even in face of high time pressure, my supervisor motivates me to consistently follow the safety rules                                                         | .66 |
| Hol_mb11  | When I seem to be stressed, my supervisor responds to it and tries to propose solutions                                                                        | .70 |
| Hol_mb12  | When my supervisor is under the impression that someone is ill, he/she sends this person to the doctor or home                                                 | .62 |
| Hol_mb13  | My supervisor makes sure that the topic of health receives sufficient attention in our team                                                                    | .80 |
| Hol_mb14* | If there is a lot of work that needs to be done, then rest breaks sometimes have to be skipped                                                                 | .24 |
| Hol_mb15  | My supervisor motivates me to take advantage of worksite health promotion offers (e.g., back exercises, relaxation, stress management)                         | .66 |
| Hol_mb16  | My supervisor tries to reduce my work demands by optimizing my work routines (e.g., set priorities, ensure for undisturbed work, daily planning)               | .70 |
| Hol_mb17  | My supervisor tries to reduce my demands by optimizing my working conditions (e.g., avoid unbalanced body-posture, care for enough space, avoid draft)         | .67 |
| Hol_mb18  | My supervisor tries to reduce my demands by optimizing my work-life balance (e.g., take regular breaks, avoid overtime, avoid the expiration of vacation days) | .75 |
| Hol_mb19  | By fostering positive interactions with one another, my supervisor sees to it that my work demands are reduced                                                 | .64 |

---

\* reverse-coded item

Table S2. Overview of variable names and Mplus code for the cross-cluster mediation model

| Measures                                         | Name in the Mplus code |
|--------------------------------------------------|------------------------|
| Team identifier                                  | teamid                 |
| Age                                              | age                    |
| Gender                                           | sex                    |
| Tenure with leader                               | tenfk                  |
| Span of control                                  | fkspan                 |
| Leader self care                                 | fksb                   |
| Leader staff care                                | fkob                   |
| Employee staff care                              | mb                     |
| Employee self care                               | sb                     |
| Employee staff care aggregated to the team level | mb_m                   |
| Employee self care aggregated to the team level  | sb_m                   |
| Irritation                                       | irr                    |

Mplus code for the cross-cluster mediation model (example for irritation as health outcome):

```

CLUSTER = teamid;
BETWEEN = fkspan fksb fkob mb_m sb_m;
WITHIN = age sex tenfk mb sb;
DEFINE:
  mb_m = CLUSTER_MEAN(mb);
  sb_m = CLUSTER_MEAN(sb);
  CENTER age tenfk fkspan sb mb fksb fkob mb_m sb_m(GRANDMEAN);
ANALYSIS:
  TYPE = TWOLEVEL;
  ESTIMATOR = MLR;
MODEL:
%WITHIN%
  !controls
  irr sb mb ON age sex tenfk;

  !within-team direct effects of employee staff care on health
  irr ON mb(b2_w);

  !within-team direct effects of employee self care on health
  irr ON sb(b12_w);

  !within-team effect of employee staff care on self care
  sb WITH mb;

%BETWEEN%
  !controls
  irr sb_m mb_m fkob ON fkspan;

```

!direct effect of leader self care on employee self care (a1-path)  
sb\_m ON fksb(a12);

!direct effect of leader self care on leader staff care (a1-path)  
fkob ON fksb(a1);

!direct effect of leader self care on employee staff care (a2-path)  
mb\_m ON fksb(a2);

!direct effect of staff care on health  
irr ON fkob(b1);

!direct effect of staff care on health  
irr ON mb\_m(b2\_b);

!direct effect of self care on health  
irr ON sb\_m(b12\_b);

!direct effect of leader staff care on employee staff care  
mb\_m ON fkob(d1);

!effect of leader staff care on health  
irr ON fksb(c);

#### MODEL CONSTRAINT:

NEW(a1b1 a2b2\_w a2b2\_b a1d1b2\_w a1d1b2\_b TOTSTAFF a12b12\_w a12b12\_b  
TOTSELF);

a1b1 = a1\*b1; !Specific indirect effect of leader self care on health via leader staff care  
a2b2\_w = a2\*b2\_w; !Specific within-indirect effect of leader self care on health via employee  
staff care

a2b2\_b = a2\*b2\_b; !Specific between-indirect effect of leader self care on health via  
employee staff care

a1d1b2\_w = a1\*d1\*b2\_w; !Specific within-indirect effect of leader self care on health via  
leader and employee staff care

a1d1b2\_b = a1\*d1\*b2\_b; !Specific between-indirect effect of leader self care on health via  
leader and employee staff car

TOTSTAFF = c +a1b1 + a2b2\_w + a2b2\_b + a1d1b2\_w + a1d1b2\_b; !Total effect via staff  
care

a12b12\_w = a12\*b12\_w; !Indirect within-effect of leader self care on health via employee  
self care

a12b12\_b = a12\*b12\_b; !Indirect between-effect of leader self care on health via employee  
self care

TOTSELF = c + a12\*b12\_w + a12\*b12\_b; !Total effect self care
